# Supplementary material for: Exceptional optical performance of the zero-dimensional hybrid cuprous halide ETPA2Cu2I4 as an X-ray scintillator
Source: Royal Society of Chemistry journal article supplement (doi:10.1039/d3qi02169f), 2023-11-27
Supplement: d3qi02169f1.pdf [file d3qi02169f1.pdf]

## Supporting Information

# Exceptional Optical Performance of Zero-Dimensional Hybrid Cuprous Halide ETPA<sub>2</sub>Cu<sub>2</sub>I<sub>4</sub> as an X-ray Scintillator

Yuxin Zhan<sup>1</sup>, Peiqing Cai<sup>1,2\*</sup>, Xipeng Pu<sup>3</sup>, Qi Ai<sup>1</sup>, Junjie Si<sup>1</sup>, Xin Yao<sup>1</sup>, Gongxun Bai<sup>1</sup>  
and Zugang Liu<sup>1\*</sup>

<sup>1</sup>College of Optical and Electronic Technology, China Jiliang University, Hangzhou, Zhejiang 310018, China.

<sup>2</sup>College of Chemistry, Chemical Engineering and Materials Science, Soochow University, Suzhou, 215123, China

<sup>3</sup>School of Materials Science and Engineering, Liaocheng University, Liaocheng, Shandong 252000, China.

\*Author to whom correspondence should be addressed. Email: pqcai@cjlu.edu.cn, and zgliu78@cjlu.edu.cn.

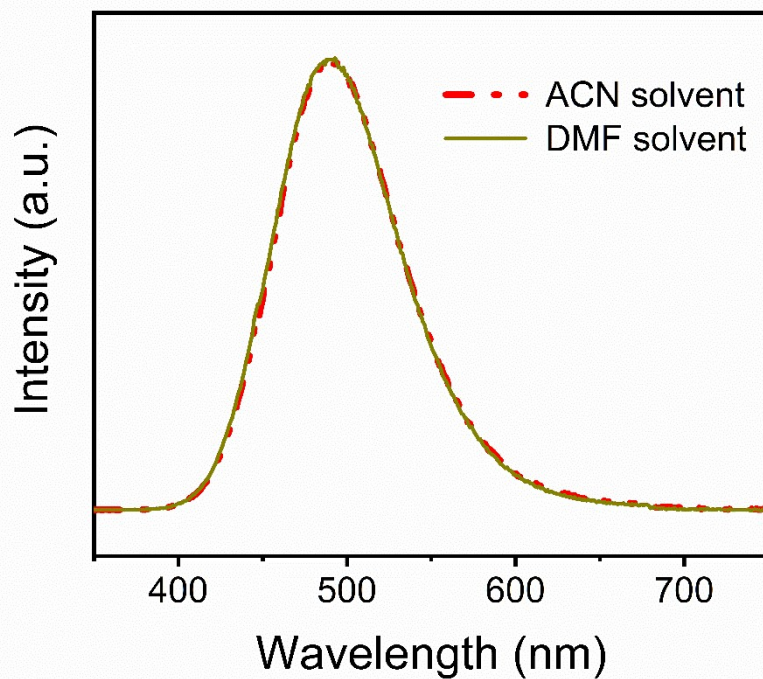

**Figure S1.** The PL spectra of powder synthesized with acetonitrile (CAN) and DMF were compared.

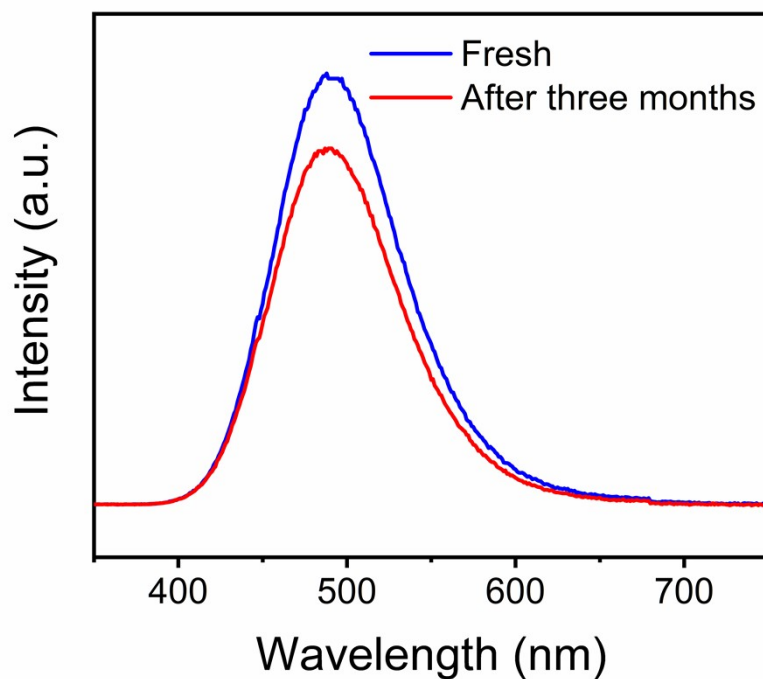

**Figure S2.** Comparison of PL spectra of samples after three months at constant humidity and spectra of freshly prepared samples.

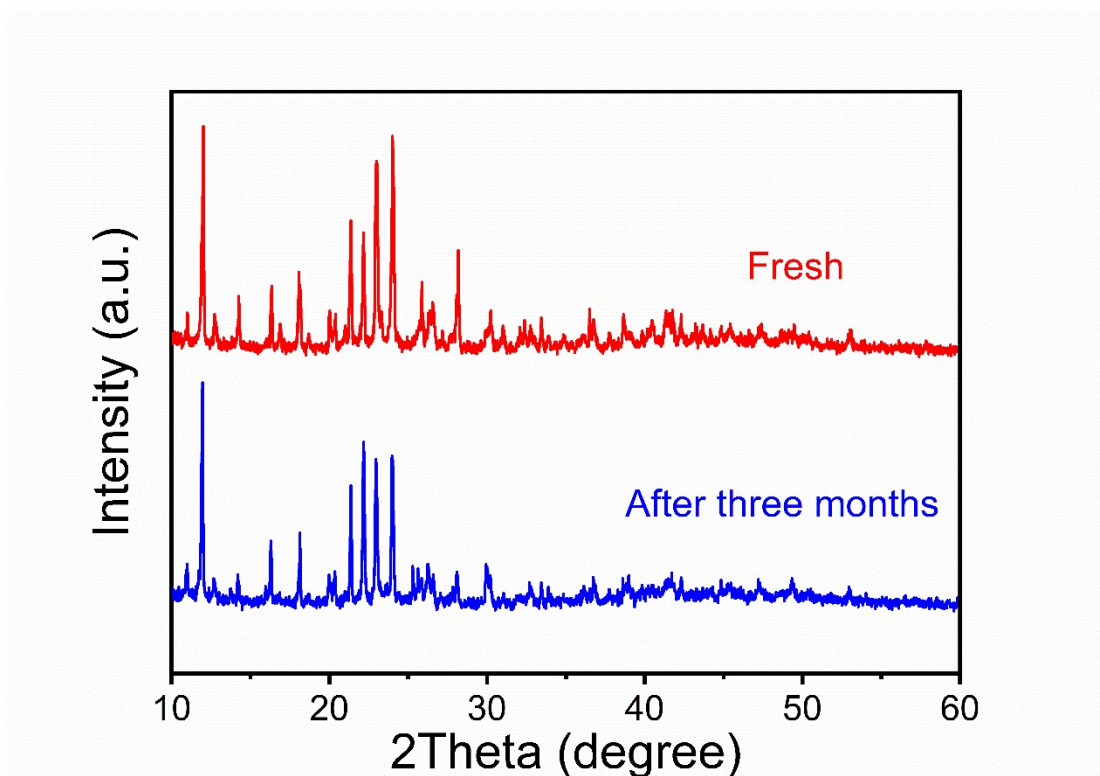

**Figure S3.** After standing at constant humidity for three months, the PXRD of the sample and the newly prepared sample were compared.

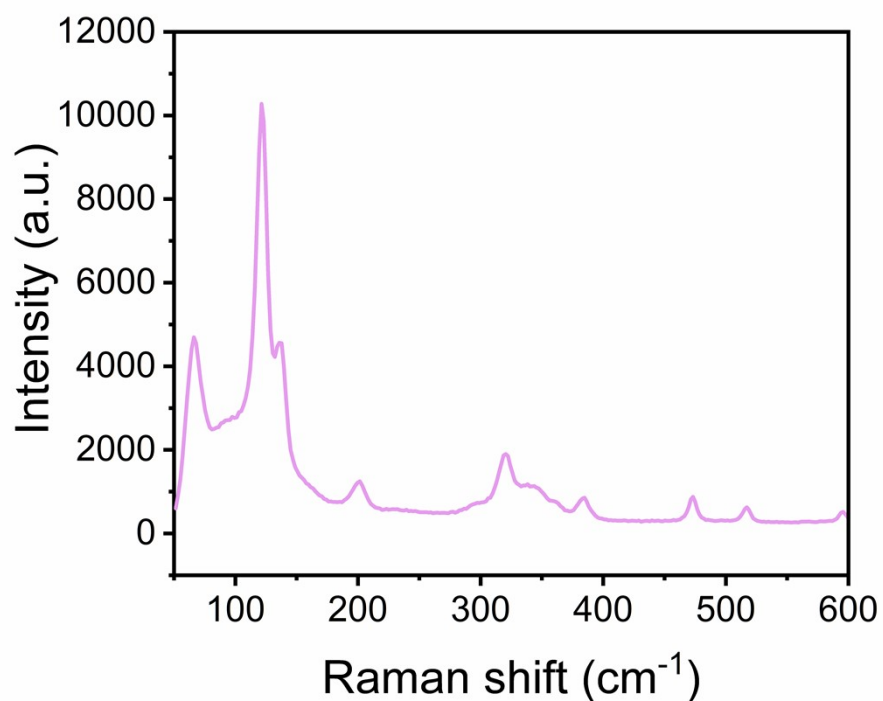

**Figure S4.** The Raman spectrum for ETPA<sub>2</sub>Cu<sub>2</sub>I<sub>4</sub> powder.

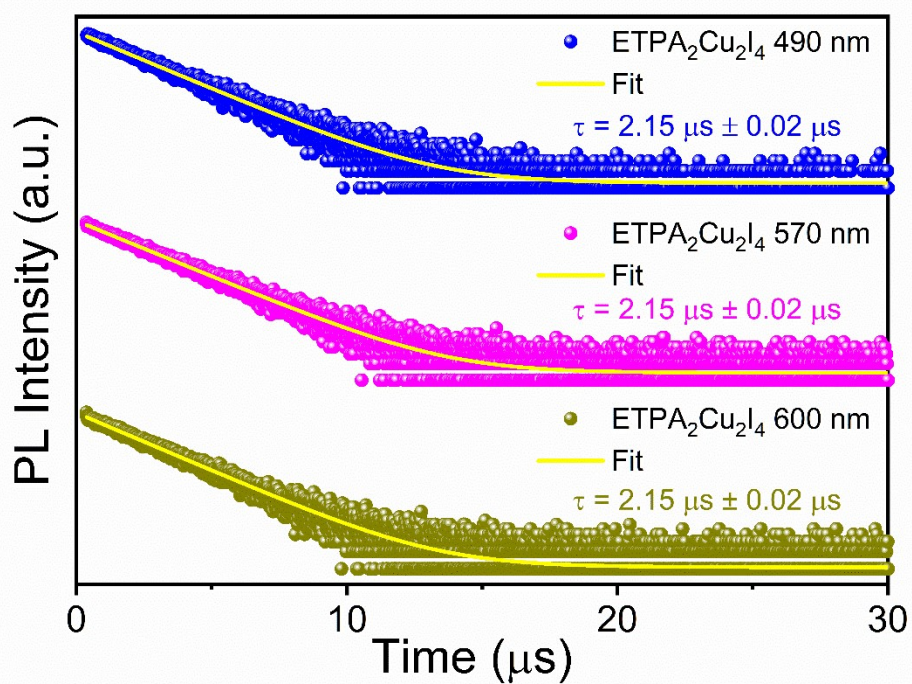

**Figure S5.** The lifetime comparison of different emission wavelengths of the band emission is measured.

**Table S1.** The element ratio in SEM images of ETPA<sub>2</sub>Cu<sub>2</sub>I<sub>4</sub> single crystal.

| Spectrum |           |         |            |         |
|----------|-----------|---------|------------|---------|
| Element  | Line type | Weight% | Wt % Sigma | Atomic% |
| C        | K         | 31.34   | 0.14       | 79.04   |
| Cu       | L         | 19.20   | 0.13       | 9.15    |
| I        | L         | 49.46   | 0.14       | 11.81   |
| N        | K         | 0.00    | 0.28       | 0.00    |
| Totals   | /         | 100.00  | /          | 100.00  |

**Table S2.** The crystal structure parameters of ETPA<sub>2</sub>Cu<sub>2</sub>I<sub>4</sub> single crystals.

| Compound                          | [C <sub>11</sub> H <sub>26</sub> N] <sub>2</sub> Cu <sub>2</sub> I <sub>4</sub> |
|-----------------------------------|---------------------------------------------------------------------------------|
| Empirical formula                 | C <sub>11</sub> H <sub>26</sub> Cu <sub>2</sub> N                               |
| Formula weight                    | 489.67                                                                          |
| Temperature/K                     | 193                                                                             |
| Crystal system                    | monoclinic                                                                      |
| Space group                       | P2 <sub>1</sub> /n                                                              |
| a/Å                               | 8.7432(4)                                                                       |
| b/Å                               | 13.7442(4)                                                                      |
| c/Å                               | 14.1671(5)                                                                      |
| α/°                               | 90                                                                              |
| β/°                               | 99.9180(10)                                                                     |
| γ/°                               | 90                                                                              |
| V/Å <sup>3</sup>                  | 1676.99(11)                                                                     |
| Z                                 | 4                                                                               |
| Dcalcd (g/cm <sup>3</sup> )       | 1.939                                                                           |
| μ (mm <sup>-1</sup> )             | 4.962                                                                           |
| F (000)                           | 936                                                                             |
| Radiation                         | MoKα (λ = 0.71073)                                                              |
| Reflections collected             | 15272                                                                           |
| Independent reflections           | 3826                                                                            |
| Goodness-of-fit on F <sup>2</sup> | 1.038                                                                           |
| Final R indexes (I>2σ(I))         | R <sub>1</sub> <sup>[a]</sup> = 0.0430, wR <sub>2</sub> = 0.1080                |
| Final R indexes (all data)        | R <sub>1</sub> = 0.0511, wR <sub>2</sub> <sup>[b]</sup> = 0.1145                |

$$[a] R_1 = \sum \| |F_o| - |F_c| \| / \sum |F_o|, [b] wR_2 = [ \sum w(F_o^2 - F_c^2)^2 / \sum w(F_o^2)^2 ]^{1/2}$$

**Table S3.** Main bond lengths in ETPA<sub>2</sub>Cu<sub>2</sub>I<sub>4</sub> single crystals.

| Atom | Atom | Length/Å   |
|------|------|------------|
| I1   | Cu1  | 2.4917(7)  |
| I2   | Cu11 | 2.5604(8)  |
| I2   | Cu1  | 2.5503(8)  |
| Cu1  | Cu11 | 2.8560(13) |
| N1   | C4   | 1.516(6)   |
| N1   | C1   | 1.511(6)   |
| N1   | C10  | 1.514(7)   |
| N1   | C7   | 1.534(7)   |
| C4   | C5   | 1.501(8)   |
| C1   | C2   | 1.496(9)   |
| C10  | C11  | 1.481(9)   |
| C5   | C6   | 1.482(9)   |
| C7   | C8   | 1.468(9)   |
| C2   | C3   | 1.485(8)   |
| C8   | C9   | 1.468(10)  |

**Table S4.** Main bond angles in ETPA<sub>2</sub>Cu<sub>2</sub>I<sub>4</sub> single crystals.

| Atom | Atom | Atom | Angle/°   |
|------|------|------|-----------|
| Cu1  | I2   | Cu11 | 67.95(3)  |
| I1   | Cu1  | I2   | 125.35(3) |
| I1   | Cu1  | I21  | 122.56(3) |
| I1   | Cu1  | Cu11 | 177.55(4) |
| I2   | Cu1  | I21  | 112.05(3) |
| I2   | Cu1  | Cu11 | 56.19(2)  |
| I21  | Cu1  | Cu11 | 55.86(2)  |
| C4   | N1   | C7   | 108.8(4)  |
| C1   | N1   | C4   | 108.8(4)  |
| C1   | N1   | C10  | 109.7(4)  |
| C1   | N1   | C7   | 110.7(4)  |
| C10  | N1   | C4   | 111.1(4)  |
| C10  | N1   | C7   | 107.8(4)  |
| C5   | C4   | N1   | 116.8(5)  |
| C2   | C1   | N1   | 116.6(5)  |
| C11  | C10  | N1   | 117.6(5)  |
| C6   | C5   | C4   | 111.5(6)  |
| C8   | C7   | N1   | 116.9(5)  |
| C3   | C2   | C1   | 113.1(6)  |
| C9   | C8   | C7   | 115.1(7)  |

**Table S5.** Fractional atomic coordinates ( $\times 10^4$ ) and equivalent isotropic displacement parameters ( $\text{\AA}^2 \times 10^3$ ) for ETPA<sub>2</sub>Cu<sub>2</sub>I<sub>4</sub> single crystals.  $U_{eq}$  is defined as 1/3 of the trace of the orthogonalised  $U_{ij}$ .

| Atom | x          | y         | z         | $U_{eq}$  |
|------|------------|-----------|-----------|-----------|
| I1   | 9445.2(5)  | 4057.6(3) | 7529.8(3) | 58.44(17) |
| I2   | 11379.3(6) | 6172.6(3) | 5636.7(3) | 68.49(18) |
| Cu1  | 9785.5(8)  | 4682.7(5) | 5928.1(5) | 52.4(2)   |
| N1   | 5921(4)    | 7451(3)   | 3996(3)   | 40.3(8)   |
| C4   | 5161(6)    | 7157(4)   | 2994(4)   | 51.0(11)  |
| C1   | 5130(7)    | 8356(4)   | 4280(4)   | 55.2(13)  |
| C10  | 7637(7)    | 7647(5)   | 4043(4)   | 62.8(15)  |
| C5   | 5891(8)    | 6327(5)   | 2543(4)   | 64.4(15)  |
| C7   | 5759(8)    | 6611(4)   | 4685(4)   | 57.9(13)  |
| C11  | 8089(8)    | 8376(6)   | 3372(5)   | 80(2)     |
| C6   | 5008(8)    | 6087(5)   | 1582(5)   | 70.3(18)  |
| C2   | 3455(8)    | 8260(5)   | 4364(6)   | 73.4(19)  |
| C8   | 6310(11)   | 6791(6)   | 5709(5)   | 86(2)     |
| C3   | 2778(9)    | 9178(5)   | 4663(5)   | 73.3(19)  |
| C9   | 6094(11)   | 5978(6)   | 6346(6)   | 95(3)     |

**Table S6.** Anisotropic displacement parameters ( $\times 10^4$ ) for ETPA<sub>2</sub>Cu<sub>2</sub>I<sub>4</sub> single crystals. The anisotropic displacement factor exponent takes the form:  $-2p^2 [h^2 a^{*2} \times U_{11} + \dots + 2hka^* \times b^* \times U_{12}]$

| Atom | $U_{11}$ | $U_{22}$ | $U_{33}$ | $U_{23}$  | $U_{13}$  | $U_{12}$ |
|------|----------|----------|----------|-----------|-----------|----------|
| I1   | 58.4(3)  | 72.7(3)  | 47.3(2)  | 10.35(15) | 17.78(16) | 5.60(16) |
| I2   | 87.5(3)  | 72.1(3)  | 46.7(2)  | 1.83(16)  | 13.98(19) | -23.8(2) |
| Cu1  | 51.7(4)  | 58.1(4)  | 50.1(4)  | 7.1(3)    | 16.5(3)   | 10.0(3)  |
| N1   | 39(2)    | 40.7(19) | 40(2)    | -2.2(15)  | 4.2(15)   | -0.1(15) |
| C4   | 48(3)    | 57(3)    | 47(3)    | -4(2)     | 6(2)      | -4(2)    |
| C1   | 65(3)    | 45(3)    | 55(3)    | -5(2)     | 9(2)      | 0(2)     |
| C10  | 50(3)    | 81(4)    | 55(3)    | -8(3)     | 0(2)      | -4(3)    |
| C5   | 68(4)    | 71(4)    | 54(3)    | -10(3)    | 12(3)     | 0(3)     |
| C7   | 70(4)    | 50(3)    | 53(3)    | 3(2)      | 11(3)     | 7(3)     |
| C11  | 65(4)    | 98(5)    | 78(5)    | -6(4)     | 19(3)     | -29(4)   |
| C6   | 66(4)    | 81(4)    | 66(4)    | -31(3)    | 18(3)     | -15(3)   |
| C2   | 74(4)    | 59(3)    | 96(5)    | 3(3)      | 39(4)     | 7(3)     |
| C8   | 114(7)   | 93(5)    | 53(4)    | 18(3)     | 19(4)     | 14(4)    |
| C3   | 89(5)    | 71(4)    | 67(4)    | 14(3)     | 32(3)     | 32(3)    |
| C9   | 114(7)   | 103(6)   | 69(5)    | 34(4)     | 22(4)     | 46(5)    |

**Table S7.** Hydrogen fractional atomic coordinates ( $\times 10^4$ ) and equivalent isotropic displacement parameters ( $\text{\AA}^2 \times 10^3$ ) for [C<sub>11</sub>H<sub>26</sub>N]<sub>2</sub>Cu<sub>2</sub>I<sub>4</sub> single crystals.  $U_{eq}$  is defined as 1/3 of the trace of the orthogonalised  $U_{ij}$

| Atom | x       | y       | z       | $U_{eq}$ |
|------|---------|---------|---------|----------|
| H4A  | 4067    | 6982.76 | 3011.23 | 61       |
| H4B  | 5147.71 | 7731.49 | 2571.38 | 61       |
| H1A  | 5706.37 | 8583.39 | 4904.12 | 66       |
| H1B  | 5220.38 | 8869.85 | 3802.27 | 66       |
| H10A | 8068.14 | 7858.95 | 4703.58 | 75       |
| H10B | 8145.32 | 7023.92 | 3932.8  | 75       |
| H5A  | 6968.8  | 6502.73 | 2485.68 | 77       |
| H5B  | 5931.82 | 5747.68 | 2961.87 | 77       |
| H7A  | 4649.13 | 6427.75 | 4600.81 | 69       |
| H7B  | 6331.08 | 6043.77 | 4492.18 | 69       |
| H11A | 7718.98 | 8166.38 | 2711.44 | 120      |
| H11B | 9222.34 | 8438.63 | 3480.34 | 120      |
| H11C | 7624.77 | 9006.58 | 3481.38 | 120      |
| H6A  | 5023.81 | 6646.37 | 1154.53 | 105      |
| H6B  | 3932.1  | 5932.28 | 1634.82 | 105      |
| H6C  | 5485.25 | 5525.09 | 1321.94 | 105      |
| H2A  | 2859.09 | 8054.3  | 3736.96 | 88       |



|     |         |         |         |     |
|-----|---------|---------|---------|-----|
| H2B | 3347.14 | 7745.24 | 4836.11 | 88  |
| H8A | 7429.54 | 6951.82 | 5801.79 | 104 |
| H8B | 5759.86 | 7366.85 | 5903.7  | 104 |
| H3A | 2875.46 | 9690.82 | 4196.69 | 110 |
| H3B | 3333.49 | 9371.84 | 5295.49 | 110 |
| H3C | 1678.49 | 9075.44 | 4694.04 | 110 |
| H9A | 6483.39 | 5377.33 | 6099.54 | 142 |
| H9B | 4987.53 | 5905.64 | 6372.25 | 142 |
| H9C | 6668.13 | 6109.5  | 6990.31 | 142 |

---
